# Supplementary material for: Development and Usability Testing of a Web-Based and Therapist-Assisted Coping Skills Program for Managing Psychosocial Problems in Individuals With Hand and Upper Limb Injuries: Mixed Methods Study
Source: PubMed Central journal article supplement (PMC7240444; doi:10.2196/17088), 2020-05-06
Supplement: humanfactors_v7i2e17088_app2.pdf [file humanfactors_v7i2e17088_app2.pdf]

**Multimedia Appendix 2:** Heuristic Evaluation of HOCOS by ICT experts using general and readability guidelines of the Health Literacy Online (HLO) Checklist

| <b>Domain</b>                                                   | <b>Criteria</b>                                                     | <b>HOCOS</b>                                                                                                  |
|-----------------------------------------------------------------|---------------------------------------------------------------------|---------------------------------------------------------------------------------------------------------------|
| Domain 1.<br>Writer<br>actionable<br>content                    | a. Identify user motivations and goals.                             | Yes                                                                                                           |
|                                                                 | b. Put the most important information first.                        | No – key information not consistent in the first paragraph                                                    |
|                                                                 | c. Describe the health behavior - just the basics                   | Yes                                                                                                           |
|                                                                 | d. Stay positive. Include the benefits of taking action.            | Yes                                                                                                           |
|                                                                 | e. Provide specific action steps.                                   | Yes                                                                                                           |
|                                                                 | f. Write in plain language.                                         | No – poor use of the active voice, use of jargon and long sentences.                                          |
|                                                                 | g. Check content for accuracy                                       | Yes                                                                                                           |
| Domain 2.<br>Display<br>Content<br>Clearly on the<br>Page       | a. Limit paragraph size. Use bullets and short lists.               | Yes                                                                                                           |
|                                                                 | b. Use meaningful headings.                                         | Yes                                                                                                           |
|                                                                 | c. Use a readable font that's at least 16 pixels.                   | No – inconsistent font sizes.                                                                                 |
|                                                                 | d. Use white space and avoid clutter.                               | Yes                                                                                                           |
|                                                                 | e. Keep the most important content above the fold - even on mobile. | No – key information sometimes below the fold                                                                 |
|                                                                 | f. Use links effectively.                                           | Yes                                                                                                           |
|                                                                 | g. Use color or underline to identify links.                        | Yes                                                                                                           |
|                                                                 | h. Use images that help people learn.                               | Yes                                                                                                           |
|                                                                 | i. Use appropriate contrast.                                        | Yes                                                                                                           |
|                                                                 | j. Make web content printer friendly.                               | Yes                                                                                                           |
|                                                                 | k. Make your site accessible to people with disabilities.           | No                                                                                                            |
|                                                                 | l. Make websites responsive.                                        | Yes                                                                                                           |
|                                                                 | m. Design mobile content to meet mobile users' needs.               | No – mobile format needs a lot of editing.                                                                    |
| Domain 3.<br>Organize<br>content and<br>simplify<br>navigation. | a. Create a simple and engaging homepage.                           | No – need to use links with clickable buttons. The image used does not directly reflect the planned end user. |
|                                                                 | b. Label and organize content with your users in mind.              | Yes                                                                                                           |
|                                                                 | c. Create linear information paths.                                 | No – too much scrolling to get through materials.                                                             |
|                                                                 | d. Give buttons meaningful labels.                                  | Yes                                                                                                           |
|                                                                 | e. Make clickable elements recognizable.                            | No – users must skim across some headings before they become clickable.                                       |
|                                                                 | f. Make sure the browser “Back” button works.                       | No – inconsistent on the website                                                                              |
|                                                                 | g. Provide easy access to home and menu pages.                      | Yes                                                                                                           |

|                           |                                                     |                                                          |
|---------------------------|-----------------------------------------------------|----------------------------------------------------------|
|                           | h. Give users options to browse.                    | Yes                                                      |
|                           | i. Include a simple search function.                | No – search function not available.                      |
|                           | j. Display search results clearly.                  | No – search function not available.                      |
|                           |                                                     |                                                          |
| Domain 4.<br>Engage Users | a. Share information through multimedia.            | Yes – good use of multimedia.                            |
|                           | b. Design intuitive interactive graphics and tools. | No – missing interactive graphics and tools.             |
|                           | c. Provide tailored information.                    | No – no means to tailor and guide information gathering. |
|                           | d. Create user-friendly forms and quizzes.          | Yes                                                      |
|                           | e. Consider social media sharing options.           | No – no social media sharing option.                     |

Reference: US Department of Health and Human Services (DHHS), Office of Disease Prevention and Health Promotion. “Health Literacy Online: A Guide to Simplifying the User Experience.” 2nd ed. 2015. Available on <https://health.gov/healthliteracyonline/checklist/>
