# Supplementary material for: Development and Usability Testing of a Web-Based and Therapist-Assisted Coping Skills Program for Managing Psychosocial Problems in Individuals With Hand and Upper Limb Injuries: Mixed Methods Study
Source: PubMed Central journal article supplement (PMC7240444; doi:10.2196/17088), 2020-05-06
Supplement: humanfactors_v7i2e17088_app3.pdf [file humanfactors_v7i2e17088_app3.pdf]

| <b>Heuristic</b>                                                                  | <b>Description</b>                                                                                                                                                                                                  | <b>HOCOS</b>                                                                                           |
|-----------------------------------------------------------------------------------|---------------------------------------------------------------------------------------------------------------------------------------------------------------------------------------------------------------------|--------------------------------------------------------------------------------------------------------|
| Item 1. Immediately inform users of purpose and engage users; avoid registration. | Identify the purpose and audience on the home screen page. If unavoidable, make registration and logging in simple and obvious.                                                                                     | Criteria met                                                                                           |
| Item 2. Use complementary interaction methods.                                    | Make use of alternative inputs (e.g., touch screen, barcode scanning, voice commands) and outputs (e.g., audio recordings, videos, text-to-speech engines).                                                         | Criteria met                                                                                           |
| Item 3. Leverage interactivity.                                                   | Offer interactive tools (e.g., quizzes, questionnaires, glossaries, tutorials) to engage with the information and provide performance feedback. Allow users to share information (e.g., print, e-mail) with others. | Criteria not met<br>- the little interactivity on the website does not provide participant engagement. |
| Item 4. Provide accurate, colloquial, comprehensive, succinct content.            | Written information should be brief, relevant, and in user's vernacular.                                                                                                                                            | Criteria not met<br>- poor use of plain language (grade 6 level)                                       |
| Item 5. Provide tailored, flexible, layered content.                              | Prioritize information according to importance. If possible, personalize information. Provide succinct summaries but allow users to access more detailed information. Offer content in multiple languages.          | Criteria not met<br>- content not prioritized or personalized, use of English language alone.          |
| Item 6. Use visuals to complement text but avoid tables.                          | Visuals (e.g., pictures, videos, animations) may enhance written information. If unavoidable, tables should be designed as independent, simplistic representations of information.                                  | Criteria met                                                                                           |
| Item 7. Simplistic, consistent navigation.                                        | Keep users oriented. Use linear navigation to facilitate forward and backward movement. Use large buttons, clearly label links, and provide a search engine.                                                        | Criteria met                                                                                           |
| Item 8. Simplistic, consistent displays.                                          | Avoid on-screen complexity. Avoid the need for scrolling by limiting information on a page/screen.                                                                                                                  | Criteria not met<br>- too much scrolling to access key information.                                    |
| Item 9. Clear and comprehensive communication of risks.                           | Describe risk terminology in a way the users will understand. Use 100 as upper limit on bar graphs. Avoid logarithmic scales.                                                                                       | Criteria not met<br>- risk such as privacy/confidentiality not clearly conveyed                        |
| Item 10. Clear depiction of monitoring data and/or test results.                  | Emphasize values outside acceptable ranges. Facilitate pattern recognition and rapid identification of influential factors.                                                                                         | Not applicable                                                                                         |
| Item 11. Considerations for mobile devices.                                       | Allow users to adjust the display size using familiar input (e.g., pinch to zoom, turning to landscape orientation). Use appropriately sized interface elements. Limit the amount of information displayed.         | Criteria met                                                                                           |

Reference: Monkman, H., J. Griffith, and A. W. Kushniruk. "Evidence-based Heuristics for Evaluating Demands on eHealth Literacy and Usability in a Mobile Consumer Health Application." *Studies in Health Technology and Informatics* 2015; 216:358
